# Supplementary material for: The development of hoof balance and landing preference in the post‐natal period
Source: PubMed Central journal article supplement — Equine Vet J. 2018 May 17;50(6):809–17. doi: 10.1111/evj.12961 (PMC6175397; doi:10.1111/evj.12961), 2018-05-17
Supplement: EVJ-50-809-s001.pdf [file EVJ-50-809-s001.pdf]

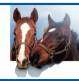

Supplementary Item 1: Model estimates and significances.

| Gait      | Variable           | Front/Hind limbs | Parameter 1        | Parameter 2 | lower    | est.   | upper  | P value | Rank  | B-H corrected P value |     |     |
|-----------|--------------------|------------------|--------------------|-------------|----------|--------|--------|---------|-------|-----------------------|-----|-----|
| Walk      | ASI Toe - Heel 1%  | Front            | Week 0,5           | Week 1      | -49.7    | 15.7   | 81.0   | 0.6     | 530   | 0.8                   |     |     |
|           |                    |                  | Week 0,5           | Week 2      | -26.1    | 38.4   | 102.8  | 0.3     | 372   | 0.4                   |     |     |
|           |                    |                  | Week 0,5           | Week 4      | -74.5    | -10.8  | 52.9   | 0.7     | 563   | 0.9                   |     |     |
|           |                    |                  | Week 0,5           | Week 6      | -122.5   | -58.8  | 4.9    | 0.1     | 252   | 0.2                   |     |     |
|           |                    |                  | Week 0,5           | Week 8      | -145.1   | -81.4  | -17.6  | 0.02    | 144   | 0.1                   |     |     |
|           |                    |                  | Week 0,5           | Week 10     | -142.1   | -78.4  | -14.7  | 0.02    | 165   | 0.1                   |     |     |
|           |                    |                  | Week 0,5           | Week 12     | -153.7   | -90.0  | -26.2  | 0.01    | 124   | 0.04                  |     |     |
|           |                    |                  | Week 0,5           | Week 16     | -75.2    | -12.2  | 50.9   | 0.7     | 555   | 0.8                   |     |     |
|           |                    |                  | Week 0,5           | Week 20     | -58.4    | 4.6    | 67.6   | 0.9     | 628   | 0.9                   |     |     |
|           |                    |                  | Week 0,5           | Week 24     | -38.1    | 24.9   | 88.0   | 0.5     | 460   | 0.6                   |     |     |
|           |                    |                  | Left side          | Right side  | -19.5    | -1.1   | 17.3   | 0.9     | 634   | 0.9                   |     |     |
|           |                    |                  | Week 0,5           | Week 1      | -53.0    | 12.8   | 78.7   | 0.7     | 554   | 0.8                   |     |     |
|           |                    | Week 0,5         | Week 2             | -104.1      | -39.1    | 26.0   | 0.3    | 370     | 0.4   |                       |     |     |
|           |                    | Week 0,5         | Week 4             | -49.5       | 15.5     | 80.6   | 0.6    | 531     | 0.8   |                       |     |     |
|           |                    | Week 0,5         | Week 6             | -97.4       | -32.4    | 32.7   | 0.3    | 414     | 0.5   |                       |     |     |
|           |                    | Week 0,5         | Week 8             | -85.3       | -21.0    | 43.3   | 0.5    | 485     | 0.7   |                       |     |     |
|           |                    | Week 0,5         | Week 10            | -78.3       | -14.0    | 50.3   | 0.7    | 545     | 0.8   |                       |     |     |
|           |                    | Week 0,5         | Week 12            | -52.0       | 13.1     | 78.1   | 0.7    | 552     | 0.8   |                       |     |     |
|           |                    | Week 0,5         | Week 16            | -72.6       | -5.8     | 60.9   | 0.9    | 619     | 0.9   |                       |     |     |
|           |                    | Week 0,5         | Week 20            | -106.8      | -40.1    | 26.6   | 0.3    | 369     | 0.4   |                       |     |     |
|           |                    | Week 0,5         | Week 24            | -17.5       | 49.3     | 116.0  | 0.2    | 311     | 0.3   |                       |     |     |
|           |                    | Walk             | ASI Toe - Heel 25% | Front       | Week 0,5 | Week 1 | -39.2  | -13.1   | 13.1  | 0.3                   | 413 | 0.5 |
|           |                    |                  |                    |             | Week 0,5 | Week 2 | -29.5  | -3.6    | 22.2  | 0.8                   | 579 | 0.9 |
|           |                    |                  |                    |             | Week 0,5 | Week 4 | -41.3  | -15.8   | 9.7   | 0.2                   | 364 | 0.4 |
| Week 0,5  | Week 6             |                  |                    |             | -60.9    | -35.3  | -9.8   | 0.01    | 129   | 0.04                  |     |     |
| Week 0,5  | Week 8             |                  |                    |             | -82.5    | -57.0  | -31.5  | <0.001  | 33    | <0.001                |     |     |
| Week 0,5  | Week 10            |                  |                    |             | -71.0    | -45.5  | -20.0  | <0.001  | 68    | 0.01                  |     |     |
| Week 0,5  | Week 12            |                  |                    |             | -81.8    | -56.2  | -30.7  | <0.001  | 35    | <0.001                |     |     |
| Week 0,5  | Week 16            |                  |                    |             | -78.2    | -53.0  | -27.7  | <0.001  | 44    | 0.001                 |     |     |
| Week 0,5  | Week 20            |                  |                    |             | -71.9    | -46.6  | -21.4  | <0.001  | 62    | 0.005                 |     |     |
| Week 0,5  | Week 24            |                  |                    |             | -52.1    | -26.8  | -1.6   | 0.04    | 217   | 0.1                   |     |     |
| Left side | Right side         |                  |                    |             | -6.7     | 0.7    | 8.0    | 0.9     | 617   | 0.9                   |     |     |
| Week 0,5  | Week 1             |                  |                    |             | -29.7    | -3.4   | 23.0   | 0.8     | 588   | 0.9                   |     |     |
| Week 0,5  | Week 2             |                  |                    | -13.6       | 12.5     | 38.6   | 0.4    | 426     | 0.6   |                       |     |     |
| Week 0,5  | Week 4             |                  |                    | -28.7       | -2.6     | 23.4   | 0.8    | 604     | 0.9   |                       |     |     |
| Week 0,5  | Week 6             |                  |                    | -33.6       | -7.5     | 18.5   | 0.6    | 503     | 0.8   |                       |     |     |
| Week 0,5  | Week 8             |                  |                    | -23.4       | 2.4      | 28.2   | 0.9    | 615     | 0.9   |                       |     |     |
| Week 0,5  | Week 10            |                  |                    | -12.8       | 12.9     | 38.7   | 0.3    | 412     | 0.5   |                       |     |     |
| Week 0,5  | Week 12            |                  |                    | -8.0        | 18.1     | 44.1   | 0.2    | 331     | 0.4   |                       |     |     |
| Week 0,5  | Week 16            |                  |                    | -9.8        | 16.9     | 43.7   | 0.2    | 357     | 0.4   |                       |     |     |
| Week 0,5  | Week 20            |                  |                    | -9.2        | 17.6     | 44.3   | 0.2    | 345     | 0.4   |                       |     |     |
| Week 0,5  | Week 24            |                  |                    | 29.5        | 56.2     | 83.0   | <0.001 | 43      | 0.001 |                       |     |     |
| Walk      | ASI Toe - Heel 50% |                  |                    | Front       | Week 0,5 | Week 1 | -40.9  | -9.2    | 22.6  | 0.6                   | 504 | 0.8 |
|           |                    |                  |                    |             | Week 0,5 | Week 2 | -41.0  | -9.7    | 21.7  | 0.6                   | 499 | 0.7 |
|           |                    |                  |                    |             | Week 0,5 | Week 4 | -55.0  | -24.0   | 6.9   | 0.1                   | 302 | 0.3 |
|           |                    | Week 0,5         | Week 6             |             | -82.9    | -52.0  | -21.0  | 0.001   | 77    | 0.01                  |     |     |
|           |                    | Week 0,5         | Week 8             |             | -95.8    | -64.8  | -33.8  | <0.001  | 45    | 0.001                 |     |     |
|           |                    | Week 0,5         | Week 10            |             | -87.8    | -56.8  | -25.9  | <0.001  | 63    | 0.01                  |     |     |
|           |                    | Week 0,5         | Week 12            |             | -109.0   | -78.0  | -47.0  | <0.001  | 25    | <0.001                |     |     |
|           |                    | Week 0,5         | Week 16            |             | -115.0   | -84.4  | -53.7  | <0.001  | 18    | <0.001                |     |     |
|           |                    | Week 0,5         | Week 20            |             | -109.5   | -78.9  | -48.2  | <0.001  | 22    | <0.001                |     |     |
|           |                    | Week 0,5         | Week 24            |             | -82.7    | -52.1  | -21.4  | 0.001   | 74    | 0.01                  |     |     |
|           |                    | Left side        | Right side         |             | -6.1     | 2.9    | 11.8   | 0.5     | 488   | 0.7                   |     |     |
|           |                    | Week 0,5         | Week 1             |             | -50.6    | -18.6  | 13.4   | 0.3     | 381   | 0.5                   |     |     |
|           |                    | Week 0,5         | Week 2             | -34.6       | -3.0     | 28.6   | 0.9    | 611     | 0.9   |                       |     |     |
|           |                    | Week 0,5         | Week 4             | -55.7       | -24.1    | 7.5    | 0.1    | 305     | 0.3   |                       |     |     |
|           |                    | Week 0,5         | Week 6             | -54.2       | -22.6    | 9.1    | 0.2    | 324     | 0.4   |                       |     |     |
|           |                    | Week 0,5         | Week 8             | -44.8       | -13.5    | 17.7   | 0.4    | 442     | 0.6   |                       |     |     |
|           |                    | Week 0,5         | Week 10            | -35.9       | -4.6     | 26.7   | 0.8    | 576     | 0.9   |                       |     |     |
|           |                    | Week 0,5         | Week 12            | -24.4       | 7.2      | 38.8   | 0.7    | 538     | 0.8   |                       |     |     |
|           |                    | Week 0,5         | Week 16            | -35.0       | -2.5     | 29.9   | 0.9    | 625     | 0.9   |                       |     |     |
|           |                    | Week 0,5         | Week 20            | -28.2       | 4.2      | 36.7   | 0.8    | 585     | 0.9   |                       |     |     |
|           |                    | Week 0,5         | Week 24            | 6.3         | 38.8     | 71.3   | 0.02   | 175     | 0.1   |                       |     |     |
|           |                    |                  |                    | Front       | Week 0,5 | Week 1 | -15.6  | 21.8    | 59.2  | 0.3                   | 380 | 0.5 |
|           |                    |                  |                    |             | Week 0,5 | Week 2 | -4.5   | 32.4    | 69.3  | 0.1                   | 273 | 0.2 |
|           |                    |                  |                    |             | Week 0,5 | Week 4 | 8.9    | 45.3    | 81.8  | 0.02                  | 157 | 0.1 |
| Week 0,5  | Week 6             |                  |                    |             | -26.3    | 10.2   | 46.7   | 0.6     | 514   | 0.8                   |     |     |
| Week 0,5  | Week 8             |                  |                    |             | -27.1    | 9.4    | 45.9   | 0.6     | 525   | 0.8                   |     |     |
| Week 0,5  | Week 10            |                  |                    |             | -13.1    | 23.4   | 59.8   | 0.2     | 351   | 0.4                   |     |     |
| Week 0,5  | Week 12            |                  |                    |             | -51.9    | -15.4  | 21.2   | 0.4     | 449   | 0.6                   |     |     |
| Week 0,5  | Week 16            |                  |                    |             | -90.0    | -53.9  | -17.8  | 0.005   | 108   | 0.03                  |     |     |

|      |                    |         |           |            |        |        |       |        |     |       |
|------|--------------------|---------|-----------|------------|--------|--------|-------|--------|-----|-------|
| Walk | ASI Toe - Heel 75% |         | Week 0,5  | Week 20    | -105.8 | -69.7  | -33.6 | <0.001 | 55  | 0.003 |
|      |                    |         | Week 0,5  | Week 24    | -87.7  | -51.7  | -15.6 | 0.01   | 120 | 0.04  |
|      |                    |         | Left side | Right side | 0.2    | 10.8   | 21.3  | 0.1    | 227 | 0.1   |
|      |                    |         | Week 0,5  | Week 1     | -55.8  | -18.1  | 19.6  | 0.4    | 425 | 0.6   |
|      |                    |         | Week 0,5  | Week 2     | -32.3  | 4.9    | 42.2  | 0.8    | 584 | 0.9   |
|      |                    |         | Week 0,5  | Week 4     | -53.7  | -16.4  | 20.8  | 0.4    | 437 | 0.6   |
|      |                    |         | Week 0,5  | Week 6     | -52.6  | -15.3  | 21.9  | 0.4    | 452 | 0.6   |
|      |                    |         | Week 0,5  | Week 8     | -37.3  | -0.4   | 36.4  | 1.0    | 648 | 1.0   |
|      |                    |         | Week 0,5  | Week 10    | -25.9  | 11.0   | 47.8  | 0.6    | 502 | 0.7   |
|      |                    |         | Week 0,5  | Week 12    | -35.2  | 2.0    | 39.3  | 0.9    | 637 | 0.9   |
|      |                    |         | Week 0,5  | Week 16    | -45.5  | -7.3   | 30.9  | 0.7    | 557 | 0.8   |
|      |                    |         | Week 0,5  | Week 20    | -36.0  | 2.2    | 40.4  | 0.9    | 633 | 0.9   |
|      | Week 0,5           | Week 24 | -17.8     | 20.4       | 58.7   | 0.3    | 395   | 0.5    |     |       |
| Trot | ASI Toe - Heel 1%  |         | Week 2    | Week 4     | -70.2  | -6.8   | 56.5  | 0.8    | 598 | 0.9   |
|      |                    |         | Week 2    | Week 6     | -100.0 | -35.9  | 28.3  | 0.3    | 388 | 0.5   |
|      |                    |         | Week 2    | Week 8     | -101.6 | -39.0  | 23.6  | 0.2    | 361 | 0.4   |
|      |                    |         | Week 2    | Week 10    | -122.9 | -57.7  | 7.5   | 0.1    | 269 | 0.2   |
|      |                    |         | Week 2    | Week 12    | -119.4 | -56.1  | 7.3   | 0.1    | 270 | 0.2   |
|      |                    |         | Week 2    | Week 16    | -166.9 | -102.7 | -38.6 | 0.002  | 89  | 0.02  |
|      |                    |         | Week 2    | Week 20    | -99.5  | -36.1  | 27.2  | 0.3    | 383 | 0.5   |
|      |                    |         | Week 2    | Week 24    | -130.8 | -66.6  | -2.4  | 0.05   | 224 | 0.1   |
|      |                    |         | Left side | Right side | -43.5  | -21.7  | 0.1   | 0.1    | 234 | 0.2   |
|      |                    |         | Week 2    | Week 4     | -81.6  | -18.3  | 45.1  | 0.6    | 506 | 0.8   |
|      |                    |         | Week 2    | Week 6     | -76.9  | -14.4  | 48.1  | 0.7    | 536 | 0.8   |
|      |                    |         | Week 2    | Week 8     | -86.1  | -23.7  | 38.8  | 0.5    | 468 | 0.7   |
|      | Week 2             | Week 10 | -169.5    | -102.8     | -36.1  | 0.004  | 98    | 0.02   |     |       |
|      | Week 2             | Week 12 | -101.1    | -35.7      | 29.8   | 0.3    | 391   | 0.5    |     |       |
|      | Week 2             | Week 16 | -122.5    | -57.1      | 8.4    | 0.1    | 275   | 0.2    |     |       |
|      | Week 2             | Week 20 | -101.1    | -33.1      | 34.9   | 0.4    | 419   | 0.6    |     |       |
|      | Week 2             | Week 24 | -134.3    | -68.8      | -3.4   | 0.05   | 219   | 0.1    |     |       |
| Trot | ASI Toe - Heel 25% |         | Week 2    | Week 4     | -23.1  | -2.1   | 19.0  | 0.9    | 608 | 0.9   |
|      |                    |         | Week 2    | Week 6     | -44.0  | -22.7  | -1.4  | 0.04   | 214 | 0.1   |
|      |                    |         | Week 2    | Week 8     | -47.1  | -26.3  | -5.5  | 0.02   | 151 | 0.1   |
|      |                    |         | Week 2    | Week 10    | -49.0  | -27.3  | -5.7  | 0.02   | 152 | 0.1   |
|      |                    |         | Week 2    | Week 12    | -53.5  | -32.5  | -11.5 | 0.003  | 97  | 0.02  |
|      |                    |         | Week 2    | Week 16    | -55.1  | -33.8  | -12.5 | 0.003  | 92  | 0.02  |
|      |                    |         | Week 2    | Week 20    | -50.0  | -29.0  | -7.9  | 0.01   | 130 | 0.05  |
|      |                    |         | Week 2    | Week 24    | -23.4  | -2.0   | 19.3  | 0.9    | 610 | 0.9   |
|      |                    |         | Left side | Right side | -8.1   | -0.8   | 6.4   | 0.8    | 597 | 0.9   |
|      |                    |         | Week 2    | Week 4     | -46.7  | -25.6  | -4.6  | 0.02   | 168 | 0.1   |
|      |                    |         | Week 2    | Week 6     | -39.5  | -18.8  | 2.0   | 0.1    | 264 | 0.2   |
|      |                    |         | Week 2    | Week 8     | -26.4  | -5.7   | 15.0  | 0.6    | 516 | 0.8   |
|      | Week 2             | Week 10 | -16.2     | 5.9        | 28.1   | 0.6    | 520   | 0.8    |     |       |
|      | Week 2             | Week 12 | -12.4     | 9.3        | 31.1   | 0.4    | 443   | 0.6    |     |       |
|      | Week 2             | Week 16 | -11.1     | 10.7       | 32.4   | 0.4    | 417   | 0.5    |     |       |
|      | Week 2             | Week 20 | -10.3     | 12.3       | 34.9   | 0.3    | 390   | 0.5    |     |       |
|      | Week 2             | Week 24 | 1.1       | 22.8       | 44.6   | 0.05   | 220   | 0.1    |     |       |
| Trot | ASI Toe - Heel 50% |         | Week 2    | Week 4     | -22.1  | 1.8    | 25.7  | 0.9    | 627 | 0.9   |
|      |                    |         | Week 2    | Week 6     | -44.1  | -19.9  | 4.3   | 0.1    | 288 | 0.3   |
|      |                    |         | Week 2    | Week 8     | -45.2  | -21.6  | 2.0   | 0.1    | 257 | 0.2   |
|      |                    |         | Week 2    | Week 10    | -47.3  | -22.7  | 1.9   | 0.1    | 253 | 0.2   |
|      |                    |         | Week 2    | Week 12    | -50.3  | -26.4  | -2.5  | 0.04   | 201 | 0.1   |
|      |                    |         | Week 2    | Week 16    | -55.9  | -31.7  | -7.5  | 0.01   | 137 | 0.1   |
|      |                    |         | Week 2    | Week 20    | -49.3  | -25.4  | -1.5  | 0.04   | 216 | 0.1   |
|      |                    |         | Week 2    | Week 24    | -22.0  | 2.2    | 26.4  | 0.9    | 616 | 0.9   |
|      |                    |         | Left side | Right side | -4.2   | 4.0    | 12.2  | 0.4    | 420 | 0.6   |
|      |                    |         | Week 2    | Week 4     | -68.7  | -44.8  | -20.9 | <0.001 | 59  | 0.004 |
|      |                    |         | Week 2    | Week 6     | -63.6  | -40.0  | -16.4 | 0.001  | 75  | 0.01  |
|      |                    |         | Week 2    | Week 8     | -55.3  | -31.7  | -8.2  | 0.01   | 133 | 0.1   |
|      | Week 2             | Week 10 | -41.7     | -16.6      | 8.6    | 0.2    | 344   | 0.4    |     |       |
|      | Week 2             | Week 12 | -42.6     | -17.9      | 6.8    | 0.2    | 318   | 0.3    |     |       |
|      | Week 2             | Week 16 | -39.1     | -14.4      | 10.3   | 0.3    | 378   | 0.5    |     |       |
|      | Week 2             | Week 20 | -27.2     | -1.6       | 24.1   | 0.9    | 631   | 0.9    |     |       |
|      | Week 2             | Week 24 | -22.8     | 1.9        | 26.6   | 0.9    | 624   | 0.9    |     |       |
| Trot | ASI Toe - Heel 75% |         | Week 2    | Week 4     | -16.1  | 17.7   | 51.6  | 0.3    | 400 | 0.5   |
|      |                    |         | Week 2    | Week 6     | -43.4  | -9.2   | 25.1  | 0.6    | 519 | 0.8   |
|      |                    |         | Week 2    | Week 8     | -45.5  | -12.1  | 21.3  | 0.5    | 472 | 0.7   |
|      |                    |         | Week 2    | Week 10    | -65.5  | -30.7  | 4.1   | 0.1    | 272 | 0.2   |
|      |                    |         | Week 2    | Week 12    | -73.8  | -40.0  | -6.2  | 0.02   | 180 | 0.1   |
|      |                    |         | Week 2    | Week 16    | -85.7  | -51.5  | -17.2 | 0.004  | 106 | 0.03  |
|      |                    |         | Week 2    | Week 20    | -94.5  | -60.7  | -26.9 | <0.001 | 66  | 0.01  |
|      |                    |         | Week 2    | Week 24    | -69.4  | -35.2  | -0.9  | 0.1    | 226 | 0.1   |
|      |                    |         | Left side | Right side | -6.5   | 5.1    | 16.8  | 0.4    | 439 | 0.6   |

|      |                    |           |            |       |       |       |       |     |      |
|------|--------------------|-----------|------------|-------|-------|-------|-------|-----|------|
|      |                    | Week 2    | Week 4     | -82.4 | -48.6 | -14.7 | 0.01  | 119 | 0.04 |
|      |                    | Week 2    | Week 6     | -69.8 | -36.4 | -3.0  | 0.04  | 205 | 0.1  |
|      |                    | Week 2    | Week 8     | -52.9 | -19.6 | 13.8  | 0.3   | 377 | 0.5  |
|      |                    | Week 2    | Week 10    | -41.1 | -5.5  | 30.1  | 0.8   | 572 | 0.9  |
|      |                    | Week 2    | Week 12    | -39.2 | -4.3  | 30.6  | 0.8   | 593 | 0.9  |
|      |                    | Week 2    | Week 16    | -44.9 | -10.0 | 25.0  | 0.6   | 509 | 0.8  |
|      |                    | Week 2    | Week 20    | -53.2 | -16.8 | 19.5  | 0.4   | 429 | 0.6  |
|      |                    | Week 2    | Week 24    | -44.3 | -9.3  | 25.6  | 0.6   | 521 | 0.8  |
|      |                    | Week 0,5  | Week 1     | -32.9 | 0.0   | 32.9  | 1.0   | 651 | 1.0  |
|      |                    | Week 0,5  | Week 2     | -42.9 | -10.4 | 22.0  | 0.5   | 491 | 0.7  |
|      |                    | Week 0,5  | Week 4     | -25.1 | 7.0   | 39.1  | 0.7   | 544 | 0.8  |
|      |                    | Week 0,5  | Week 6     | -13.2 | 18.8  | 50.9  | 0.3   | 376 | 0.5  |
|      |                    | Week 0,5  | Week 8     | -28.7 | 3.4   | 35.5  | 0.8   | 600 | 0.9  |
|      |                    | Week 0,5  | Week 10    | -42.8 | -10.8 | 21.3  | 0.5   | 483 | 0.7  |
|      |                    | Week 0,5  | Week 12    | -36.2 | -4.1  | 27.9  | 0.8   | 587 | 0.9  |
|      |                    | Week 0,5  | Week 16    | -46.3 | -14.5 | 17.2  | 0.4   | 431 | 0.6  |
|      |                    | Week 0,5  | Week 20    | -36.1 | -4.4  | 27.3  | 0.8   | 580 | 0.9  |
|      |                    | Week 0,5  | Week 24    | -41.8 | -10.0 | 21.7  | 0.5   | 495 | 0.7  |
| Walk | MAD Toe - Heel 1%  | Left side | Right side | -16.2 | -7.0  | 2.3   | 0.2   | 308 | 0.3  |
|      |                    | Week 0,5  | Week 1     | -43.6 | -10.5 | 22.6  | 0.5   | 494 | 0.7  |
|      |                    | Week 0,5  | Week 2     | -54.4 | -21.7 | 11.0  | 0.2   | 342 | 0.4  |
|      |                    | Week 0,5  | Week 4     | -20.1 | 12.6  | 45.4  | 0.5   | 462 | 0.7  |
|      |                    | Week 0,5  | Week 6     | -53.3 | -20.6 | 12.1  | 0.2   | 358 | 0.4  |
|      |                    | Week 0,5  | Week 8     | -28.3 | 4.1   | 36.5  | 0.8   | 590 | 0.9  |
|      |                    | Week 0,5  | Week 10    | -36.5 | -4.1  | 28.3  | 0.8   | 589 | 0.9  |
|      |                    | Week 0,5  | Week 12    | -29.3 | 3.4   | 36.2  | 0.8   | 601 | 0.9  |
|      |                    | Week 0,5  | Week 16    | -64.0 | -30.4 | 3.1   | 0.1   | 263 | 0.2  |
|      |                    | Week 0,5  | Week 20    | -34.5 | -0.9  | 32.6  | 1.0   | 646 | 1.0  |
|      |                    | Week 0,5  | Week 24    | -26.1 | 7.4   | 41.0  | 0.7   | 542 | 0.8  |
|      |                    | Week 0,5  | Week 1     | -18.1 | -8.9  | 0.2   | 0.1   | 241 | 0.2  |
|      |                    | Week 0,5  | Week 2     | -2.3  | 6.7   | 15.8  | 0.2   | 310 | 0.3  |
|      |                    | Week 0,5  | Week 4     | -15.1 | -6.2  | 2.8   | 0.2   | 333 | 0.4  |
|      |                    | Week 0,5  | Week 6     | -19.6 | -10.7 | -1.7  | 0.02  | 174 | 0.1  |
|      |                    | Week 0,5  | Week 8     | -19.5 | -10.6 | -1.6  | 0.02  | 178 | 0.1  |
|      |                    | Week 0,5  | Week 10    | -20.3 | -11.3 | -2.4  | 0.02  | 146 | 0.1  |
|      |                    | Week 0,5  | Week 12    | -17.2 | -8.3  | 0.6   | 0.1   | 251 | 0.2  |
|      |                    | Week 0,5  | Week 16    | -22.3 | -13.5 | -4.6  | 0.004 | 100 | 0.02 |
|      |                    | Week 0,5  | Week 20    | -17.3 | -8.4  | 0.4   | 0.1   | 244 | 0.2  |
|      |                    | Week 0,5  | Week 24    | -19.8 | -10.9 | -2.1  | 0.02  | 161 | 0.1  |
| Walk | MAD Toe - Heel 25% | Left side | Right side | -1.8  | 0.8   | 3.4   | 0.5   | 492 | 0.7  |
|      |                    | Week 0,5  | Week 1     | -11.2 | -2.0  | 7.2   | 0.7   | 546 | 0.8  |
|      |                    | Week 0,5  | Week 2     | -20.2 | -11.1 | -2.0  | 0.02  | 167 | 0.1  |
|      |                    | Week 0,5  | Week 4     | -18.4 | -9.3  | -0.1  | 0.1   | 230 | 0.2  |
|      |                    | Week 0,5  | Week 6     | -20.0 | -10.9 | -1.7  | 0.02  | 176 | 0.1  |
|      |                    | Week 0,5  | Week 8     | -18.8 | -9.8  | -0.8  | 0.04  | 207 | 0.1  |
|      |                    | Week 0,5  | Week 10    | -22.2 | -13.2 | -4.2  | 0.01  | 115 | 0.03 |
|      |                    | Week 0,5  | Week 12    | -16.9 | -7.8  | 1.3   | 0.1   | 279 | 0.2  |
|      |                    | Week 0,5  | Week 16    | -24.4 | -15.1 | -5.7  | 0.002 | 86  | 0.02 |
|      |                    | Week 0,5  | Week 20    | -21.1 | -11.8 | -2.4  | 0.02  | 154 | 0.1  |
|      |                    | Week 0,5  | Week 24    | -19.5 | -10.1 | -0.8  | 0.04  | 206 | 0.1  |
|      |                    | Week 0,5  | Week 1     | -14.8 | -6.1  | 2.6   | 0.2   | 327 | 0.4  |
|      |                    | Week 0,5  | Week 2     | -9.3  | -0.7  | 7.8   | 0.9   | 620 | 0.9  |
|      |                    | Week 0,5  | Week 4     | -16.2 | -7.7  | 0.7   | 0.1   | 258 | 0.2  |
|      |                    | Week 0,5  | Week 6     | -19.4 | -11.0 | -2.5  | 0.01  | 140 | 0.1  |
|      |                    | Week 0,5  | Week 8     | -20.8 | -12.3 | -3.9  | 0.01  | 117 | 0.03 |
|      |                    | Week 0,5  | Week 10    | -19.2 | -10.7 | -2.3  | 0.02  | 148 | 0.1  |
|      |                    | Week 0,5  | Week 12    | -17.5 | -9.0  | -0.6  | 0.04  | 212 | 0.1  |
|      |                    | Week 0,5  | Week 16    | -22.1 | -13.7 | -5.4  | 0.002 | 81  | 0.01 |
|      |                    | Week 0,5  | Week 20    | -20.8 | -12.5 | -4.1  | 0.005 | 107 | 0.03 |
|      |                    | Week 0,5  | Week 24    | -19.6 | -11.3 | -2.9  | 0.01  | 132 | 0.1  |
| Walk | MAD Toe - Heel 50% | Left side | Right side | -3.4  | -0.9  | 1.5   | 0.5   | 466 | 0.6  |
|      |                    | Week 0,5  | Week 1     | -5.6  | 3.1   | 11.8  | 0.5   | 474 | 0.7  |
|      |                    | Week 0,5  | Week 2     | -16.5 | -7.9  | 0.7   | 0.1   | 254 | 0.2  |
|      |                    | Week 0,5  | Week 4     | -13.0 | -4.4  | 4.2   | 0.3   | 409 | 0.5  |
|      |                    | Week 0,5  | Week 6     | -17.1 | -8.5  | 0.1   | 0.1   | 236 | 0.2  |
|      |                    | Week 0,5  | Week 8     | -18.4 | -9.9  | -1.4  | 0.03  | 184 | 0.1  |
|      |                    | Week 0,5  | Week 10    | -16.6 | -8.1  | 0.5   | 0.1   | 247 | 0.2  |
|      |                    | Week 0,5  | Week 12    | -11.0 | -2.4  | 6.2   | 0.6   | 515 | 0.8  |
|      |                    | Week 0,5  | Week 16    | -22.3 | -13.4 | -4.6  | 0.004 | 101 | 0.03 |
|      |                    | Week 0,5  | Week 20    | -12.6 | -3.8  | 5.1   | 0.4   | 444 | 0.6  |
|      |                    | Week 0,5  | Week 24    | -16.8 | -8.0  | 0.9   | 0.1   | 265 | 0.2  |
|      |                    | Week 0,5  | Week 1     | -9.8  | 1.0   | 11.8  | 0.9   | 613 | 0.9  |
|      |                    | Week 0,5  | Week 2     | -7.2  | 3.4   | 14.1  | 0.5   | 493 | 0.7  |

|           |                    |           |                    |         |        |        |        |      |      |     |
|-----------|--------------------|-----------|--------------------|---------|--------|--------|--------|------|------|-----|
| Walk      | MAD Toe - Heel 75% | Front     | Week 0,5           | Week 4  | -5.1   | 5.4    | 16.0   | 0.3  | 404  | 0.5 |
|           |                    |           | Week 0,5           | Week 6  | -11.1  | -0.6   | 10.0   | 0.9  | 638  | 0.9 |
|           |                    |           | Week 0,5           | Week 8  | -5.9   | 4.7    | 15.2   | 0.4  | 436  | 0.6 |
|           |                    |           | Week 0,5           | Week 10 | -10.6  | -0.1   | 10.4   | 1.0  | 649  | 1.0 |
|           |                    |           | Week 0,5           | Week 12 | -6.4   | 4.2    | 14.7   | 0.4  | 458  | 0.6 |
|           |                    |           | Week 0,5           | Week 16 | -12.7  | -2.3   | 8.1    | 0.7  | 543  | 0.8 |
|           |                    | Week 0,5  | Week 20            | -16.0   | -5.6   | 4.8    | 0.3    | 393  | 0.5  |     |
|           |                    | Week 0,5  | Week 24            | -15.4   | -5.0   | 5.4    | 0.4    | 427  | 0.6  |     |
|           |                    | Left side | Right side         | -6.6    | -3.5   | -0.5   | 0.03   | 183  | 0.1  |     |
|           |                    | Week 0,5  | Week 1             | -16.1   | -5.2   | 5.6    | 0.4    | 422  | 0.6  |     |
|           |                    | Week 0,5  | Week 2             | -21.9   | -11.1  | -0.4   | 0.05   | 223  | 0.1  |     |
|           |                    | Week 0,5  | Week 4             | -17.6   | -6.9   | 3.9    | 0.2    | 352  | 0.4  |     |
|           |                    | Week 0,5  | Week 6             | -27.0   | -16.2  | -5.5   | 0.004  | 104  | 0.03 |     |
|           |                    | Week 0,5  | Week 8             | -29.6   | -18.9  | -8.3   | <0.001 | 67   | 0.01 |     |
|           |                    | Week 0,5  | Week 10            | -23.8   | -13.2  | -2.6   | 0.02   | 158  | 0.1  |     |
|           |                    | Week 0,5  | Week 12            | -24.4   | -13.6  | -2.9   | 0.02   | 147  | 0.1  |     |
|           |                    | Week 0,5  | Week 16            | -27.4   | -16.4  | -5.3   | 0.005  | 110  | 0.03 |     |
|           |                    | Week 0,5  | Week 20            | -25.8   | -14.8  | -3.8   | 0.01   | 134  | 0.1  |     |
| Week 0,5  | Week 24            | -28.5     | -17.5              | -6.5    | 0.003  | 90     | 0.02   |      |      |     |
| Trot      | MAD Toe - Heel 1%  | Front     | Week 2             | Week 4  | -16.9  | 10.6   | 38.0   | 0.5  | 465  | 0.6 |
|           |                    |           | Week 2             | Week 6  | -3.2   | 24.6   | 52.4   | 0.1  | 271  | 0.2 |
|           |                    |           | Week 2             | Week 8  | 6.6    | 33.7   | 60.8   | 0.02 | 160  | 0.1 |
|           |                    |           | Week 2             | Week 10 | -19.3  | 8.9    | 37.1   | 0.5  | 496  | 0.7 |
|           |                    |           | Week 2             | Week 12 | -23.9  | 3.5    | 31.0   | 0.8  | 586  | 0.9 |
|           |                    |           | Week 2             | Week 16 | -27.4  | 0.3    | 28.1   | 1.0  | 647  | 1.0 |
|           |                    | Week 2    | Week 20            | -18.2   | 9.2    | 36.7   | 0.5    | 479  | 0.7  |     |
|           |                    | Week 2    | Week 24            | -6.7    | 21.1   | 48.9   | 0.1    | 306  | 0.3  |     |
|           |                    | Left side | Right side         | -13.6   | -4.1   | 5.3    | 0.4    | 438  | 0.6  |     |
|           |                    | Week 2    | Week 4             | -30.8   | -3.4   | 24.1   | 0.8    | 594  | 0.9  |     |
|           |                    | Week 2    | Week 6             | -41.2   | -14.2  | 12.9   | 0.3    | 402  | 0.5  |     |
|           |                    | Week 2    | Week 8             | -30.1   | -3.1   | 24.0   | 0.8    | 596  | 0.9  |     |
|           |                    | Week 2    | Week 10            | -26.7   | 2.2    | 31.0   | 0.9    | 626  | 0.9  |     |
|           |                    | Week 2    | Week 12            | -46.0   | -17.7  | 10.6   | 0.2    | 359  | 0.4  |     |
|           |                    | Week 2    | Week 16            | -61.0   | -32.7  | -4.4   | 0.03   | 185  | 0.1  |     |
|           |                    | Week 2    | Week 20            | -53.4   | -24.0  | 5.4    | 0.1    | 289  | 0.3  |     |
|           |                    | Week 2    | Week 24            | -46.6   | -18.2  | 10.1   | 0.2    | 350  | 0.4  |     |
|           |                    | Trot      | MAD Toe - Heel 25% | Front   | Week 2 | Week 4 | -13.4  | -5.0 | 3.4  | 0.3 |
| Week 2    | Week 6             |           |                    |         | -16.2  | -7.7   | 0.8    | 0.1  | 261  | 0.2 |
| Week 2    | Week 8             |           |                    |         | -12.5  | -4.2   | 4.1    | 0.3  | 410  | 0.5 |
| Week 2    | Week 10            |           |                    |         | -17.2  | -8.6   | 0.0    | 0.1  | 233  | 0.2 |
| Week 2    | Week 12            |           |                    |         | -13.8  | -5.4   | 2.9    | 0.2  | 348  | 0.4 |
| Week 2    | Week 16            |           |                    |         | -14.6  | -6.0   | 2.5    | 0.2  | 325  | 0.4 |
| Week 2    | Week 20            |           |                    | -17.4   | -9.0   | -0.6   | 0.04   | 210  | 0.1  |     |
| Week 2    | Week 24            |           |                    | -14.6   | -6.1   | 2.4    | 0.2    | 323  | 0.4  |     |
| Left side | Right side         |           |                    | 0.1     | 3.0    | 5.9    | 0.05   | 222  | 0.1  |     |
| Week 2    | Week 4             |           |                    | -16.3   | -7.9   | 0.5    | 0.1    | 249  | 0.2  |     |
| Week 2    | Week 6             |           |                    | -16.8   | -8.5   | -0.2   | 0.1    | 228  | 0.1  |     |
| Week 2    | Week 8             |           |                    | -16.2   | -7.9   | 0.4    | 0.1    | 245  | 0.2  |     |
| Week 2    | Week 10            |           |                    | -17.1   | -8.3   | 0.5    | 0.1    | 248  | 0.2  |     |
| Week 2    | Week 12            |           |                    | -15.7   | -7.1   | 1.6    | 0.1    | 291  | 0.3  |     |
| Week 2    | Week 16            |           |                    | -15.6   | -7.0   | 1.7    | 0.1    | 296  | 0.3  |     |
| Week 2    | Week 20            |           |                    | -14.1   | -5.1   | 3.9    | 0.3    | 386  | 0.5  |     |
| Week 2    | Week 24            |           |                    | -19.7   | -11.1  | -2.4   | 0.02   | 145  | 0.1  |     |
| Trot      | MAD Toe - Heel 50% |           |                    | Front   | Week 2 | Week 4 | -7.8   | -0.7 | 6.4  | 0.9 |
|           |                    | Week 2    | Week 6             |         | -12.6  | -5.5   | 1.7    | 0.1  | 307  | 0.3 |
|           |                    | Week 2    | Week 8             |         | -9.5   | -2.5   | 4.6    | 0.5  | 477  | 0.7 |
|           |                    | Week 2    | Week 10            |         | -14.8  | -7.5   | -0.2   | 0.05 | 225  | 0.1 |
|           |                    | Week 2    | Week 12            |         | -12.0  | -4.9   | 2.2    | 0.2  | 335  | 0.4 |
|           |                    | Week 2    | Week 16            |         | -15.0  | -7.8   | -0.7   | 0.04 | 204  | 0.1 |
|           |                    | Week 2    | Week 20            | -13.2   | -6.1   | 1.0    | 0.1    | 281  | 0.2  |     |
|           |                    | Week 2    | Week 24            | -11.7   | -4.5   | 2.7    | 0.2    | 363  | 0.4  |     |
|           |                    | Left side | Right side         | 0.5     | 2.9    | 5.4    | 0.02   | 172  | 0.1  |     |
|           |                    | Week 2    | Week 4             | -8.2    | -1.1   | 6.0    | 0.8    | 567  | 0.9  |     |
|           |                    | Week 2    | Week 6             | -12.6   | -5.6   | 1.4    | 0.1    | 293  | 0.3  |     |
|           |                    | Week 2    | Week 8             | -12.6   | -5.6   | 1.4    | 0.1    | 294  | 0.3  |     |
|           |                    | Week 2    | Week 10            | -7.8    | -0.3   | 7.1    | 0.9    | 640  | 1.0  |     |
|           |                    | Week 2    | Week 12            | -10.2   | -2.9   | 4.5    | 0.5    | 461  | 0.6  |     |
|           |                    | Week 2    | Week 16            | -8.5    | -1.1   | 6.2    | 0.8    | 570  | 0.9  |     |
|           |                    | Week 2    | Week 20            | -11.3   | -3.6   | 4.0    | 0.4    | 428  | 0.6  |     |
|           |                    | Week 2    | Week 24            | -12.1   | -4.8   | 2.6    | 0.2    | 347  | 0.4  |     |
|           |                    | Week 2    | Week 4             | -11.5   | -0.5   | 10.4   | 0.9    | 639  | 0.9  |     |
| Week 2    | Week 6             | -14.2     | -3.1               | 8.0     | 0.6    | 513    | 0.7    |      |      |     |
| Week 2    | Week 8             | -10.5     | 0.3                | 11.2    | 1.0    | 643    | 1.0    |      |      |     |

|           |                         |            |                          |                          |        |          |        |        |      |        |     |     |     |
|-----------|-------------------------|------------|--------------------------|--------------------------|--------|----------|--------|--------|------|--------|-----|-----|-----|
| Trot      | MAD Toe - Heel 75%      | Front      | Week 2                   | Week 10                  | -16.8  | -5.5     | 5.8    | 0.4    | 418  | 0.5    |     |     |     |
|           |                         |            | Week 2                   | Week 12                  | -19.0  | -8.1     | 2.9    | 0.2    | 312  | 0.3    |     |     |     |
|           |                         |            | Week 2                   | Week 16                  | -16.8  | -5.7     | 5.4    | 0.3    | 407  | 0.5    |     |     |     |
|           |                         |            | Week 2                   | Week 20                  | -19.6  | -8.6     | 2.3    | 0.1    | 300  | 0.3    |     |     |     |
|           |                         | Hind       | Week 2                   | Week 24                  | -16.6  | -5.5     | 5.6    | 0.3    | 416  | 0.5    |     |     |     |
|           |                         |            | Left side                | Right side               | -1.0   | 2.7      | 6.5    | 0.2    | 321  | 0.3    |     |     |     |
|           |                         |            | Week 2                   | Week 4                   | -24.7  | -13.7    | -2.8   | 0.02   | 155  | 0.1    |     |     |     |
|           |                         |            | Week 2                   | Week 6                   | -24.8  | -14.0    | -3.2   | 0.01   | 143  | 0.1    |     |     |     |
|           |                         |            | Week 2                   | Week 8                   | -24.8  | -14.0    | -3.2   | 0.01   | 142  | 0.1    |     |     |     |
|           |                         |            | Week 2                   | Week 10                  | -27.3  | -15.8    | -4.3   | 0.01   | 131  | 0.05   |     |     |     |
|           |                         |            | Week 2                   | Week 12                  | -15.0  | -3.7     | 7.6    | 0.5    | 487  | 0.7    |     |     |     |
|           |                         |            | Week 2                   | Week 16                  | -13.0  | -1.7     | 9.6    | 0.8    | 574  | 0.9    |     |     |     |
|           |                         |            | Week 2                   | Week 20                  | -18.7  | -6.9     | 4.8    | 0.3    | 375  | 0.5    |     |     |     |
|           |                         |            | Week 2                   | Week 24                  | -20.8  | -9.5     | 1.8    | 0.1    | 285  | 0.3    |     |     |     |
| Walk      | ASI Medial - Lateral 1% | Front      | Week 0,5                 | Week 1                   | -50.1  | 12.7     | 75.5   | 0.7    | 551  | 0.8    |     |     |     |
|           |                         |            | Week 0,5                 | Week 2                   | -101.4 | -39.4    | 22.5   | 0.2    | 353  | 0.4    |     |     |     |
|           |                         |            | Week 0,5                 | Week 4                   | -137.3 | -76.0    | -14.8  | 0.02   | 159  | 0.1    |     |     |     |
|           |                         |            | Week 0,5                 | Week 6                   | -156.5 | -95.2    | -34.0  | 0.003  | 95   | 0.02   |     |     |     |
|           |                         |            | Week 0,5                 | Week 8                   | -161.6 | -100.4   | -39.1  | 0.002  | 82   | 0.02   |     |     |     |
|           |                         |            | Week 0,5                 | Week 10                  | -173.5 | -112.2   | -51.0  | <0.001 | 65   | 0.01   |     |     |     |
|           |                         |            | Week 0,5                 | Week 12                  | -157.0 | -95.7    | -34.4  | 0.003  | 94   | 0.02   |     |     |     |
|           |                         |            | Week 0,5                 | Week 16                  | -158.8 | -98.2    | -37.6  | 0.002  | 85   | 0.02   |     |     |     |
|           |                         |            | Week 0,5                 | Week 20                  | -166.0 | -105.5   | -44.9  | <0.001 | 70   | 0.01   |     |     |     |
|           |                         |            | Week 0,5                 | Week 24                  | -157.6 | -97.0    | -36.4  | 0.002  | 88   | 0.02   |     |     |     |
|           |                         |            | Left side                | Right side               | -59.6  | -41.9    | -24.3  | <0.001 | 29   | <0.001 |     |     |     |
|           |                         |            | Hind                     | Week 0,5                 | Week 1 | -81.2    | -18.0  | 45.3   | 0.6  | 511    | 0.8 |     |     |
|           |                         | Week 0,5   |                          | Week 2                   | -111.1 | -48.6    | 14.0   | 0.1    | 301  | 0.3    |     |     |     |
|           |                         | Week 0,5   |                          | Week 4                   | -132.0 | -69.5    | -7.0   | 0.03   | 195  | 0.1    |     |     |     |
|           |                         | Week 0,5   |                          | Week 6                   | -150.5 | -88.0    | -25.5  | 0.01   | 125  | 0.04   |     |     |     |
|           |                         | Week 0,5   |                          | Week 8                   | -170.8 | -109.0   | -47.2  | <0.001 | 69   | 0.01   |     |     |     |
|           |                         | Week 0,5   |                          | Week 10                  | -193.8 | -132.0   | -70.2  | <0.001 | 40   | <0.001 |     |     |     |
|           |                         | Week 0,5   |                          | Week 12                  | -184.1 | -121.6   | -59.1  | <0.001 | 54   | 0.003  |     |     |     |
|           |                         | Week 0,5   |                          | Week 16                  | -199.1 | -134.9   | -70.8  | <0.001 | 42   | 0.001  |     |     |     |
|           |                         | Week 0,5   |                          | Week 20                  | -170.5 | -106.4   | -42.3  | 0.002  | 79   | 0.01   |     |     |     |
|           |                         | Week 0,5   |                          | Week 24                  | -164.5 | -100.4   | -36.2  | 0.003  | 93   | 0.02   |     |     |     |
|           |                         | Walk       |                          | ASI Medial - Lateral 25% | Front  | Week 0,5 | Week 1 | -35.0  | -1.0 | 33.0   | 1.0 | 644 | 1.0 |
|           |                         |            |                          |                          |        | Week 0,5 | Week 2 | -39.5  | -5.9 | 27.6   | 0.7 | 562 | 0.9 |
|           |                         |            | Week 0,5                 |                          |        | Week 4   | -68.5  | -35.3  | -2.1 | 0.04   | 215 | 0.1 |     |
| Week 0,5  | Week 6                  |            | -74.7                    |                          |        | -41.5    | -8.3   | 0.02   | 156  | 0.1    |     |     |     |
| Week 0,5  | Week 8                  |            | -80.5                    |                          |        | -47.4    | -14.2  | 0.01   | 121  | 0.04   |     |     |     |
| Week 0,5  | Week 10                 |            | -81.9                    |                          |        | -48.7    | -15.5  | 0.01   | 113  | 0.03   |     |     |     |
| Week 0,5  | Week 12                 |            | -81.3                    |                          |        | -48.1    | -14.9  | 0.01   | 118  | 0.03   |     |     |     |
| Week 0,5  | Week 16                 |            | -69.4                    |                          |        | -36.5    | -3.7   | 0.03   | 194  | 0.1    |     |     |     |
| Week 0,5  | Week 20                 |            | -74.4                    |                          |        | -41.6    | -8.8   | 0.02   | 150  | 0.1    |     |     |     |
| Week 0,5  | Week 24                 |            | -67.9                    |                          |        | -35.1    | -2.2   | 0.04   | 211  | 0.1    |     |     |     |
| Left side | Right side              |            | -33.3                    |                          |        | -23.7    | -14.2  | <0.001 | 28   | <0.001 |     |     |     |
| Hind      | Week 0,5                |            | Week 1                   |                          |        | -22.3    | 12.0   | 46.3   | 0.5  | 476    | 0.7 |     |     |
|           | Week 0,5                |            | Week 2                   |                          | -49.5  | -15.6    | 18.2   | 0.4    | 430  | 0.6    |     |     |     |
|           | Week 0,5                |            | Week 4                   |                          | -59.9  | -26.1    | 7.8    | 0.1    | 304  | 0.3    |     |     |     |
|           | Week 0,5                |            | Week 6                   |                          | -81.9  | -48.0    | -14.2  | 0.01   | 122  | 0.04   |     |     |     |
|           | Week 0,5                |            | Week 8                   |                          | -99.4  | -65.9    | -32.4  | <0.001 | 52   | 0.002  |     |     |     |
|           | Week 0,5                |            | Week 10                  |                          | -107.0 | -73.5    | -40.0  | <0.001 | 36   | <0.001 |     |     |     |
|           | Week 0,5                |            | Week 12                  |                          | -104.0 | -70.1    | -36.2  | <0.001 | 47   | 0.001  |     |     |     |
|           | Week 0,5                |            | Week 16                  |                          | -108.7 | -74.0    | -39.2  | <0.001 | 41   | <0.001 |     |     |     |
|           | Week 0,5                |            | Week 20                  |                          | -87.1  | -52.4    | -17.7  | 0.004  | 105  | 0.03   |     |     |     |
|           | Week 0,5                |            | Week 24                  |                          | -85.9  | -51.1    | -16.4  | 0.01   | 112  | 0.03   |     |     |     |
|           | Walk                    |            | ASI Medial - Lateral 50% |                          | Front  | Week 0,5 | Week 1 | -27.5  | 1.7  | 31.0   | 0.9 | 632 | 0.9 |
|           |                         |            |                          |                          |        | Week 0,5 | Week 2 | -30.4  | -1.6 | 27.2   | 0.9 | 636 | 0.9 |
| Week 0,5  |                         |            |                          |                          |        | Week 4   | -49.7  | -21.2  | 7.2  | 0.2    | 309 | 0.3 |     |
| Week 0,5  |                         | Week 6     |                          | -48.5                    |        | -20.0    | 8.5    | 0.2    | 329  | 0.4    |     |     |     |
| Week 0,5  |                         | Week 8     |                          | -54.4                    |        | -25.9    | 2.6    | 0.1    | 259  | 0.2    |     |     |     |
| Week 0,5  |                         | Week 10    |                          | -59.9                    |        | -31.4    | -2.9   | 0.04   | 202  | 0.1    |     |     |     |
| Week 0,5  |                         | Week 12    |                          | -57.4                    |        | -28.9    | -0.4   | 0.1    | 231  | 0.2    |     |     |     |
| Week 0,5  |                         | Week 16    |                          | -48.6                    |        | -20.4    | 7.8    | 0.2    | 319  | 0.3    |     |     |     |
| Week 0,5  |                         | Week 20    |                          | -46.9                    |        | -18.7    | 9.5    | 0.2    | 341  | 0.4    |     |     |     |
| Week 0,5  |                         | Week 24    |                          | -48.7                    |        | -20.5    | 7.6    | 0.2    | 316  | 0.3    |     |     |     |
| Left side |                         | Right side |                          | -25.1                    |        | -16.9    | -8.7   | <0.001 | 48   | 0.001  |     |     |     |
| Hind      |                         | Week 0,5   |                          | Week 1                   |        | -12.1    | 17.4   | 46.8   | 0.3  | 374    | 0.5 |     |     |
|           |                         | Week 0,5   |                          | Week 2                   | -31.7  | -2.6     | 26.5   | 0.9    | 618  | 0.9    |     |     |     |
|           |                         | Week 0,5   |                          | Week 4                   | -35.6  | -6.5     | 22.6   | 0.7    | 541  | 0.8    |     |     |     |
|           |                         | Week 0,5   |                          | Week 6                   | -49.2  | -20.1    | 9.0    | 0.2    | 332  | 0.4    |     |     |     |
|           |                         | Week 0,5   |                          | Week 8                   | -60.9  | -32.2    | -3.4   | 0.03   | 192  | 0.1    |     |     |     |
|           |                         | Week 0,5   |                          | Week 10                  | -65.2  | -36.5    | -7.7   | 0.02   | 149  | 0.1    |     |     |     |

|      |                          |          |           |            |        |       |        |        |       |        |
|------|--------------------------|----------|-----------|------------|--------|-------|--------|--------|-------|--------|
|      |                          | Week 0,5 | Week 12   | -62.5      | -33.4  | -4.3  | 0.03   | 188    | 0.1   |        |
|      |                          | Week 0,5 | Week 16   | -61.9      | -32.1  | -2.3  | 0.04   | 209    | 0.1   |        |
|      |                          | Week 0,5 | Week 20   | -44.7      | -14.8  | 15.0  | 0.3    | 415    | 0.5   |        |
|      |                          | Week 0,5 | Week 24   | -41.3      | -11.5  | 18.4  | 0.5    | 463    | 0.7   |        |
| Walk | ASI Medial - Lateral 75% | Week 0,5 | Week 1    | -26.3      | 4.4    | 35.2  | 0.8    | 577    | 0.9   |        |
|      |                          | Week 0,5 | Week 2    | -23.4      | 6.9    | 37.3  | 0.7    | 537    | 0.8   |        |
|      |                          | Week 0,5 | Week 4    | -45.9      | -15.9  | 14.1  | 0.3    | 398    | 0.5   |        |
|      |                          | Week 0,5 | Week 6    | -45.7      | -15.7  | 14.3  | 0.3    | 401    | 0.5   |        |
|      |                          | Week 0,5 | Week 8    | -51.0      | -21.0  | 9.0   | 0.2    | 330    | 0.4   |        |
|      |                          | Week 0,5 | Week 10   | -59.6      | -29.6  | 0.4   | 0.1    | 237    | 0.2   |        |
|      |                          | Week 0,5 | Week 12   | -57.6      | -27.6  | 2.4   | 0.1    | 255    | 0.2   |        |
|      |                          | Week 0,5 | Week 16   | -48.5      | -18.8  | 10.8  | 0.2    | 355    | 0.4   |        |
|      |                          | Week 0,5 | Week 20   | -39.2      | -9.6   | 20.1  | 0.5    | 489    | 0.7   |        |
|      |                          | Week 0,5 | Week 24   | -46.4      | -16.7  | 13.0  | 0.3    | 387    | 0.5   |        |
|      |                          |          | Left side | Right side | -14.5  | -5.8  | 2.8    | 0.2    | 338   | 0.4    |
|      |                          |          | Week 0,5  | Week 1     | 3.9    | 34.9  | 65.9   | 0.03   | 190   | 0.1    |
|      |                          |          | Week 0,5  | Week 2     | -13.9  | 16.7  | 47.3   | 0.3    | 389   | 0.5    |
|      |                          |          | Week 0,5  | Week 4     | -22.5  | 8.1   | 38.7   | 0.6    | 523   | 0.8    |
|      |                          |          | Week 0,5  | Week 6     | -31.5  | -0.9  | 29.8   | 1.0    | 645   | 1.0    |
|      |                          |          | Week 0,5  | Week 8     | -46.6  | -16.3 | 14.0   | 0.3    | 394   | 0.5    |
|      |                          |          | Week 0,5  | Week 10    | -47.4  | -17.1 | 13.2   | 0.3    | 385   | 0.5    |
|      |                          |          | Week 0,5  | Week 12    | -42.1  | -11.4 | 19.2   | 0.5    | 470   | 0.7    |
|      |                          |          | Week 0,5  | Week 16    | -47.4  | -16.0 | 15.4   | 0.3    | 408   | 0.5    |
|      |                          |          | Week 0,5  | Week 20    | -26.1  | 5.3   | 36.7   | 0.7    | 564   | 0.9    |
|      |                          | Week 0,5 | Week 24   | -21.7      | 9.8    | 41.2  | 0.6    | 497    | 0.7   |        |
| Trot | ASI Medial - Lateral 1%  | Week 2   | Week 4    | -110.5     | -62.5  | -14.4 | 0.01   | 141    | 0.1   |        |
|      |                          | Week 2   | Week 6    | -102.6     | -53.9  | -5.3  | 0.04   | 199    | 0.1   |        |
|      |                          | Week 2   | Week 8    | -120.9     | -73.4  | -26.0 | 0.003  | 96     | 0.02  |        |
|      |                          | Week 2   | Week 10   | -141.4     | -92.0  | -42.5 | <0.001 | 61     | 0.005 |        |
|      |                          | Week 2   | Week 12   | -138.7     | -90.7  | -42.7 | <0.001 | 57     | 0.004 |        |
|      |                          | Week 2   | Week 16   | -105.7     | -57.0  | -8.4  | 0.03   | 181    | 0.1   |        |
|      |                          | Week 2   | Week 20   | -105.9     | -57.9  | -9.9  | 0.02   | 171    | 0.1   |        |
|      |                          | Week 2   | Week 24   | -102.5     | -53.8  | -5.2  | 0.04   | 200    | 0.1   |        |
|      |                          |          | Left side | Right side | -60.9  | -44.4 | -27.9  | <0.001 | 21    | <0.001 |
|      |                          |          | Week 2    | Week 4     | -55.4  | -7.4  | 40.7   | 0.8    | 573   | 0.9    |
|      |                          |          | Week 2    | Week 6     | -81.8  | -34.4 | 13.0   | 0.2    | 317   | 0.3    |
|      |                          |          | Week 2    | Week 8     | -87.6  | -40.3 | 7.0    | 0.1    | 283   | 0.2    |
|      |                          |          | Week 2    | Week 10    | -122.0 | -71.5 | -20.9  | 0.01   | 123   | 0.04   |
|      |                          |          | Week 2    | Week 12    | -80.4  | -30.8 | 18.8   | 0.2    | 362   | 0.4    |
|      |                          |          | Week 2    | Week 16    | -100.2 | -50.6 | -1.0   | 0.1    | 229   | 0.1    |
|      |                          |          | Week 2    | Week 20    | -92.5  | -40.9 | 10.6   | 0.1    | 298   | 0.3    |
|      |                          | Week 2   | Week 24   | -132.0     | -82.4  | -32.8 | 0.002  | 80     | 0.01  |        |
| Trot | ASI Medial - Lateral 25% | Week 2   | Week 4    | -45.0      | -18.3  | 8.4   | 0.2    | 334    | 0.4   |        |
|      |                          | Week 2   | Week 6    | -48.4      | -21.4  | 5.7   | 0.1    | 299    | 0.3   |        |
|      |                          | Week 2   | Week 8    | -45.8      | -19.4  | 6.9   | 0.2    | 313    | 0.3   |        |
|      |                          | Week 2   | Week 10   | -52.0      | -24.5  | 3.0   | 0.1    | 267    | 0.2   |        |
|      |                          | Week 2   | Week 12   | -52.1      | -25.5  | 1.2   | 0.1    | 246    | 0.2   |        |
|      |                          | Week 2   | Week 16   | -38.6      | -11.5  | 15.5  | 0.4    | 446    | 0.6   |        |
|      |                          | Week 2   | Week 20   | -32.0      | -5.3   | 21.4  | 0.7    | 553    | 0.8   |        |
|      |                          | Week 2   | Week 24   | -29.7      | -2.7   | 24.3  | 0.8    | 606    | 0.9   |        |
|      |                          |          | Left side | Right side | -45.8  | -36.7 | -27.5  | <0.001 | 15    | <0.001 |
|      |                          |          | Week 2    | Week 4     | -20.5  | 6.2   | 32.9   | 0.7    | 535   | 0.8    |
|      |                          |          | Week 2    | Week 6     | -41.3  | -14.9 | 11.4   | 0.3    | 384   | 0.5    |
|      |                          |          | Week 2    | Week 8     | -48.1  | -21.8 | 4.5    | 0.1    | 287   | 0.3    |
|      |                          |          | Week 2    | Week 10    | -60.2  | -32.1 | -4.0   | 0.03   | 189   | 0.1    |
|      |                          |          | Week 2    | Week 12    | -38.5  | -11.0 | 16.6   | 0.4    | 457   | 0.6    |
|      |                          |          | Week 2    | Week 16    | -36.9  | -9.3  | 18.3   | 0.5    | 481   | 0.7    |
|      |                          |          | Week 2    | Week 20    | -36.9  | -8.2  | 20.4   | 0.6    | 508   | 0.8    |
|      |                          | Week 2   | Week 24   | -54.6      | -27.0  | 0.6   | 0.1    | 240    | 0.2   |        |
| Trot | ASI Medial - Lateral 50% | Week 2   | Week 4    | -27.5      | -6.1   | 15.4  | 0.6    | 510    | 0.8   |        |
|      |                          | Week 2   | Week 6    | -33.2      | -11.4  | 10.3  | 0.3    | 399    | 0.5   |        |
|      |                          | Week 2   | Week 8    | -23.8      | -2.6   | 18.6  | 0.8    | 592    | 0.9   |        |
|      |                          | Week 2   | Week 10   | -31.9      | -9.8   | 12.2  | 0.4    | 434    | 0.6   |        |
|      |                          | Week 2   | Week 12   | -30.6      | -9.1   | 12.3  | 0.4    | 447    | 0.6   |        |
|      |                          | Week 2   | Week 16   | -27.3      | -5.6   | 16.2  | 0.6    | 526    | 0.8   |        |
|      |                          | Week 2   | Week 20   | -18.0      | 3.4    | 24.9  | 0.8    | 566    | 0.9   |        |
|      |                          | Week 2   | Week 24   | -15.6      | 6.2    | 27.9  | 0.6    | 512    | 0.8   |        |
|      |                          |          | Left side | Right side | -31.6  | -24.2 | -16.8  | <0.001 | 16    | <0.001 |
|      |                          |          | Week 2    | Week 4     | -12.6  | 8.9   | 30.3   | 0.4    | 451   | 0.6    |
|      |                          |          | Week 2    | Week 6     | -26.0  | -4.8  | 16.4   | 0.7    | 540   | 0.8    |
|      |                          |          | Week 2    | Week 8     | -23.3  | -2.1  | 19.0   | 0.8    | 603   | 0.9    |
|      |                          |          | Week 2    | Week 10    | -40.7  | -18.1 | 4.5    | 0.1    | 297   | 0.3    |
|      |                          |          | Week 2    | Week 12    | -25.2  | -3.0  | 19.1   | 0.8    | 581   | 0.9    |

|           |                          |           |            |       |       |       |        |     |       |
|-----------|--------------------------|-----------|------------|-------|-------|-------|--------|-----|-------|
|           |                          | Week 2    | Week 16    | -20.0 | 2.2   | 24.4  | 0.8    | 605 | 0.9   |
|           |                          | Week 2    | Week 20    | -18.8 | 4.3   | 27.3  | 0.7    | 558 | 0.8   |
|           |                          | Week 2    | Week 24    | -30.7 | -8.5  | 13.7  | 0.5    | 467 | 0.7   |
| Trot      | ASI Medial - Lateral 75% | Week 2    | Week 4     | -29.0 | -5.5  | 18.0  | 0.7    | 533 | 0.8   |
|           |                          | Week 2    | Week 6     | -36.5 | -12.7 | 11.1  | 0.3    | 396 | 0.5   |
|           |                          | Week 2    | Week 8     | -25.4 | -2.2  | 21.0  | 0.9    | 612 | 0.9   |
|           |                          | Week 2    | Week 10    | -32.3 | -8.1  | 16.1  | 0.5    | 484 | 0.7   |
|           |                          | Week 2    | Week 12    | -27.8 | -4.3  | 19.2  | 0.7    | 560 | 0.8   |
|           |                          | Week 2    | Week 16    | -32.1 | -8.3  | 15.5  | 0.5    | 478 | 0.7   |
|           |                          | Week 2    | Week 20    | -16.4 | 7.1   | 30.6  | 0.6    | 500 | 0.7   |
|           |                          | Week 2    | Week 24    | -12.3 | 11.5  | 35.3  | 0.4    | 424 | 0.6   |
|           |                          | Left side | Right side | -22.1 | -14.0 | -5.9  | 0.001  | 72  | 0.01  |
|           |                          | Week 2    | Week 4     | -5.3  | 18.2  | 41.8  | 0.1    | 303 | 0.3   |
|           |                          | Week 2    | Week 6     | -20.7 | 2.5   | 25.7  | 0.8    | 599 | 0.9   |
|           |                          | Week 2    | Week 8     | -15.7 | 7.5   | 30.6  | 0.5    | 490 | 0.7   |
|           |                          | Week 2    | Week 10    | -37.6 | -12.8 | 11.9  | 0.3    | 405 | 0.5   |
|           |                          | Week 2    | Week 12    | -8.2  | 16.1  | 40.4  | 0.2    | 343 | 0.4   |
|           |                          | Week 2    | Week 16    | -20.6 | 3.6   | 27.9  | 0.8    | 575 | 0.9   |
|           |                          | Week 2    | Week 20    | -8.0  | 17.2  | 42.5  | 0.2    | 337 | 0.4   |
| Week 2    | Week 24                  | -23.5     | 0.8        | 25.1  | 1.0   | 641   | 1.0    |     |       |
| Walk      | MAD Medial - Lateral 1%  | Week 0,5  | Week 1     | -21.5 | 7.8   | 37.1  | 0.6    | 522 | 0.8   |
|           |                          | Week 0,5  | Week 2     | -36.8 | -7.9  | 21.0  | 0.6    | 517 | 0.8   |
|           |                          | Week 0,5  | Week 4     | -48.7 | -20.1 | 8.4   | 0.2    | 328 | 0.4   |
|           |                          | Week 0,5  | Week 6     | -51.7 | -23.1 | 5.4   | 0.1    | 292 | 0.3   |
|           |                          | Week 0,5  | Week 8     | -51.8 | -23.2 | 5.3   | 0.1    | 290 | 0.3   |
|           |                          | Week 0,5  | Week 10    | -64.5 | -36.0 | -7.4  | 0.02   | 153 | 0.1   |
|           |                          | Week 0,5  | Week 12    | -56.1 | -27.5 | 1.0   | 0.1    | 243 | 0.2   |
|           |                          | Week 0,5  | Week 16    | -56.0 | -27.8 | 0.5   | 0.1    | 238 | 0.2   |
|           |                          | Week 0,5  | Week 20    | -67.8 | -39.5 | -11.3 | 0.01   | 127 | 0.04  |
|           |                          | Week 0,5  | Week 24    | -49.0 | -20.8 | 7.5   | 0.2    | 314 | 0.3   |
|           |                          | Left side | Right side | -24.7 | -16.5 | -8.2  | <0.001 | 51  | 0.002 |
|           |                          | Week 0,5  | Week 1     | -24.9 | 4.6   | 34.1  | 0.8    | 569 | 0.9   |
|           |                          | Week 0,5  | Week 2     | -14.4 | 14.8  | 43.9  | 0.3    | 411 | 0.5   |
|           |                          | Week 0,5  | Week 4     | -21.7 | 7.4   | 36.6  | 0.6    | 527 | 0.8   |
|           |                          | Week 0,5  | Week 6     | -40.9 | -11.7 | 17.4  | 0.4    | 456 | 0.6   |
|           |                          | Week 0,5  | Week 8     | -25.2 | 3.6   | 32.4  | 0.8    | 591 | 0.9   |
|           |                          | Week 0,5  | Week 10    | -40.2 | -11.4 | 17.4  | 0.5    | 459 | 0.6   |
|           |                          | Week 0,5  | Week 12    | -41.0 | -11.8 | 17.3  | 0.4    | 454 | 0.6   |
|           |                          | Week 0,5  | Week 16    | -45.3 | -15.4 | 14.5  | 0.3    | 406 | 0.5   |
|           |                          | Week 0,5  | Week 20    | -32.3 | -2.4  | 27.5  | 0.9    | 623 | 0.9   |
| Week 0,5  | Week 24                  | -25.6     | 4.3        | 34.2  | 0.8   | 578   | 0.9    |     |       |
| Walk      | MAD Medial - Lateral 25% | Week 0,5  | Week 1     | -7.0  | 4.0   | 15.0  | 0.5    | 471 | 0.7   |
|           |                          | Week 0,5  | Week 2     | -7.5  | 3.4   | 14.2  | 0.6    | 498 | 0.7   |
|           |                          | Week 0,5  | Week 4     | -3.0  | 7.8   | 18.5  | 0.2    | 320 | 0.3   |
|           |                          | Week 0,5  | Week 6     | -10.1 | 0.6   | 11.4  | 0.9    | 635 | 0.9   |
|           |                          | Week 0,5  | Week 8     | -15.6 | -4.9  | 5.9   | 0.4    | 432 | 0.6   |
|           |                          | Week 0,5  | Week 10    | -14.2 | -3.5  | 7.2   | 0.5    | 486 | 0.7   |
|           |                          | Week 0,5  | Week 12    | -5.6  | 5.2   | 15.9  | 0.4    | 423 | 0.6   |
|           |                          | Week 0,5  | Week 16    | -12.4 | -1.8  | 8.9   | 0.8    | 565 | 0.9   |
|           |                          | Week 0,5  | Week 20    | -17.0 | -6.4  | 4.3   | 0.3    | 371 | 0.4   |
|           |                          | Week 0,5  | Week 24    | -4.2  | 6.4   | 17.0  | 0.2    | 368 | 0.4   |
|           |                          | Left side | Right side | -5.9  | -2.8  | 0.3   | 0.1    | 266 | 0.2   |
|           |                          | Week 0,5  | Week 1     | -4.0  | 7.0   | 18.1  | 0.2    | 354 | 0.4   |
|           |                          | Week 0,5  | Week 2     | -12.1 | -1.1  | 9.8   | 0.8    | 602 | 0.9   |
|           |                          | Week 0,5  | Week 4     | -21.9 | -10.9 | 0.1   | 0.1    | 232 | 0.2   |
|           |                          | Week 0,5  | Week 6     | -17.9 | -6.9  | 4.0   | 0.2    | 356 | 0.4   |
|           |                          | Week 0,5  | Week 8     | -20.8 | -10.0 | 0.9   | 0.1    | 256 | 0.2   |
|           |                          | Week 0,5  | Week 10    | -18.8 | -7.9  | 2.9   | 0.2    | 315 | 0.3   |
|           |                          | Week 0,5  | Week 12    | -15.9 | -4.9  | 6.1   | 0.4    | 433 | 0.6   |
|           |                          | Week 0,5  | Week 16    | -23.2 | -12.0 | -0.8  | 0.04   | 213 | 0.1   |
|           |                          | Week 0,5  | Week 20    | -24.8 | -13.5 | -2.3  | 0.02   | 169 | 0.1   |
| Week 0,5  | Week 24                  | -12.8     | -1.5       | 9.7   | 0.8   | 582   | 0.9    |     |       |
| Walk      | MAD Medial - Lateral 50% | Week 0,5  | Week 1     | -1.1  | 8.2   | 17.6  | 0.1    | 274 | 0.2   |
|           |                          | Week 0,5  | Week 2     | -2.7  | 6.5   | 15.8  | 0.2    | 326 | 0.4   |
|           |                          | Week 0,5  | Week 4     | -5.4  | 3.8   | 12.9  | 0.4    | 450 | 0.6   |
|           |                          | Week 0,5  | Week 6     | -5.4  | 3.7   | 12.9  | 0.4    | 453 | 0.6   |
|           |                          | Week 0,5  | Week 8     | -6.9  | 2.3   | 11.4  | 0.6    | 528 | 0.8   |
|           |                          | Week 0,5  | Week 10    | -11.5 | -2.3  | 6.8   | 0.6    | 524 | 0.8   |
|           |                          | Week 0,5  | Week 12    | -7.0  | 2.1   | 11.2  | 0.7    | 539 | 0.8   |
|           |                          | Week 0,5  | Week 16    | -9.0  | 0.0   | 9.0   | 1.0    | 652 | 1.0   |
|           |                          | Week 0,5  | Week 20    | -11.5 | -2.5  | 6.6   | 0.6    | 518 | 0.8   |
|           |                          | Week 0,5  | Week 24    | -8.0  | 1.0   | 10.1  | 0.8    | 595 | 0.9   |
| Left side | Right side               | -4.9      | -2.3       | 0.4   | 0.1   | 278   | 0.2    |     |       |

|      |                          |           |            |       |       |       |        |     |        |
|------|--------------------------|-----------|------------|-------|-------|-------|--------|-----|--------|
|      |                          | Week 0,5  | Week 1     | -12.6 | -3.2  | 6.3   | 0.5    | 480 | 0.7    |
|      |                          | Week 0,5  | Week 2     | -23.2 | -13.9 | -4.6  | 0.005  | 109 | 0.03   |
|      |                          | Week 0,5  | Week 4     | -19.6 | -10.3 | -1.0  | 0.03   | 196 | 0.1    |
|      |                          | Week 0,5  | Week 6     | -29.2 | -19.9 | -10.6 | <0.001 | 39  | <0.001 |
|      | Hind                     | Week 0,5  | Week 8     | -29.2 | -20.0 | -10.8 | <0.001 | 38  | <0.001 |
|      |                          | Week 0,5  | Week 10    | -28.0 | -18.8 | -9.6  | <0.001 | 50  | 0.001  |
|      |                          | Week 0,5  | Week 12    | -20.5 | -11.1 | -1.8  | 0.02   | 173 | 0.1    |
|      |                          | Week 0,5  | Week 16    | -32.0 | -22.5 | -12.9 | <0.001 | 30  | <0.001 |
|      |                          | Week 0,5  | Week 20    | -27.7 | -18.2 | -8.6  | <0.001 | 56  | 0.004  |
|      |                          | Week 0,5  | Week 24    | -22.9 | -13.3 | -3.8  | 0.01   | 128 | 0.04   |
|      |                          | Week 0,5  | Week 1     | 7.7   | 18.4  | 29.1  | 0.001  | 73  | 0.01   |
|      |                          | Week 0,5  | Week 2     | -6.3  | 4.2   | 14.8  | 0.4    | 455 | 0.6    |
|      |                          | Week 0,5  | Week 4     | -8.2  | 2.2   | 12.6  | 0.7    | 548 | 0.8    |
|      |                          | Week 0,5  | Week 6     | -7.3  | 3.1   | 13.5  | 0.6    | 501 | 0.7    |
|      | Front                    | Week 0,5  | Week 8     | -10.1 | 0.3   | 10.7  | 1.0    | 642 | 1.0    |
|      |                          | Week 0,5  | Week 10    | -14.2 | -3.8  | 6.7   | 0.5    | 473 | 0.7    |
|      |                          | Week 0,5  | Week 12    | -12.4 | -2.0  | 8.4   | 0.7    | 556 | 0.8    |
|      |                          | Week 0,5  | Week 16    | -11.3 | -1.0  | 9.3   | 0.9    | 609 | 0.9    |
|      |                          | Week 0,5  | Week 20    | -14.8 | -4.5  | 5.8   | 0.4    | 441 | 0.6    |
|      |                          | Week 0,5  | Week 24    | -8.9  | 1.4   | 11.7  | 0.8    | 583 | 0.9    |
| Walk | MAD Medial - Lateral 75% | Left side | Right side | -3.6  | -0.6  | 2.4   | 0.7    | 550 | 0.8    |
|      |                          | Week 0,5  | Week 1     | -17.4 | -6.6  | 4.1   | 0.2    | 366 | 0.4    |
|      |                          | Week 0,5  | Week 2     | -27.7 | -17.1 | -6.4  | 0.002  | 87  | 0.02   |
|      |                          | Week 0,5  | Week 4     | -26.7 | -16.1 | -5.4  | 0.004  | 103 | 0.03   |
|      |                          | Week 0,5  | Week 6     | -33.7 | -23.0 | -12.4 | <0.001 | 37  | <0.001 |
|      |                          | Week 0,5  | Week 8     | -34.6 | -24.1 | -13.6 | <0.001 | 32  | <0.001 |
|      | Hind                     | Week 0,5  | Week 10    | -37.0 | -26.4 | -15.9 | <0.001 | 24  | <0.001 |
|      |                          | Week 0,5  | Week 12    | -35.4 | -24.8 | -14.2 | <0.001 | 31  | <0.001 |
|      |                          | Week 0,5  | Week 16    | -33.2 | -22.4 | -11.5 | <0.001 | 49  | 0.001  |
|      |                          | Week 0,5  | Week 20    | -33.7 | -22.8 | -11.9 | <0.001 | 46  | 0.001  |
|      |                          | Week 0,5  | Week 24    | -27.6 | -16.7 | -5.8  | 0.004  | 99  | 0.02   |
|      |                          | Week 2    | Week 4     | -40.9 | -19.5 | 2.0   | 0.1    | 262 | 0.2    |
|      |                          | Week 2    | Week 6     | -18.3 | 3.4   | 25.1  | 0.8    | 568 | 0.9    |
|      |                          | Week 2    | Week 8     | -44.5 | -23.4 | -2.2  | 0.04   | 203 | 0.1    |
|      |                          | Week 2    | Week 10    | -51.6 | -29.5 | -7.5  | 0.01   | 135 | 0.1    |
|      | Front                    | Week 2    | Week 12    | -48.0 | -26.5 | -5.1  | 0.02   | 162 | 0.1    |
|      |                          | Week 2    | Week 16    | -46.7 | -25.0 | -3.2  | 0.03   | 187 | 0.1    |
|      |                          | Week 2    | Week 20    | -34.8 | -13.4 | 8.1   | 0.2    | 360 | 0.4    |
|      |                          | Week 2    | Week 24    | -41.0 | -19.3 | 2.4   | 0.1    | 268 | 0.2    |
| Trot | MAD Medial - Lateral 1%  | Left side | Right side | -21.3 | -13.9 | -6.5  | <0.001 | 58  | 0.004  |
|      |                          | Week 2    | Week 4     | -39.3 | -17.9 | 3.5   | 0.1    | 286 | 0.3    |
|      |                          | Week 2    | Week 6     | -34.1 | -12.9 | 8.2   | 0.2    | 367 | 0.4    |
|      |                          | Week 2    | Week 8     | -39.5 | -18.4 | 2.8   | 0.1    | 276 | 0.2    |
|      |                          | Week 2    | Week 10    | -46.3 | -23.7 | -1.2  | 0.05   | 218 | 0.1    |
|      | Hind                     | Week 2    | Week 12    | -46.7 | -24.5 | -2.4  | 0.04   | 198 | 0.1    |
|      |                          | Week 2    | Week 16    | -59.3 | -37.2 | -15.1 | 0.001  | 76  | 0.01   |
|      |                          | Week 2    | Week 20    | -37.2 | -14.2 | 8.8   | 0.2    | 365 | 0.4    |
|      |                          | Week 2    | Week 24    | -43.9 | -21.8 | 0.3   | 0.1    | 239 | 0.2    |
|      |                          | Week 2    | Week 4     | -0.8  | 7.8   | 16.4  | 0.1    | 260 | 0.2    |
|      |                          | Week 2    | Week 6     | -9.3  | -0.6  | 8.1   | 0.9    | 629 | 0.9    |
|      |                          | Week 2    | Week 8     | -6.0  | 2.4   | 10.9  | 0.6    | 505 | 0.8    |
|      |                          | Week 2    | Week 10    | -11.4 | -2.5  | 6.3   | 0.6    | 507 | 0.8    |
|      | Front                    | Week 2    | Week 12    | -4.9  | 3.7   | 12.2  | 0.4    | 445 | 0.6    |
|      |                          | Week 2    | Week 16    | -10.7 | -2.0  | 6.7   | 0.7    | 534 | 0.8    |
|      |                          | Week 2    | Week 20    | -14.4 | -5.9  | 2.7   | 0.2    | 336 | 0.4    |
|      |                          | Week 2    | Week 24    | -12.0 | -3.3  | 5.4   | 0.5    | 469 | 0.7    |
| Trot | MAD Medial - Lateral 25% | Left side | Right side | -1.0  | 1.9   | 4.9   | 0.2    | 346 | 0.4    |
|      |                          | Week 2    | Week 4     | -20.0 | -11.4 | -2.8  | 0.01   | 136 | 0.1    |
|      |                          | Week 2    | Week 6     | -24.0 | -15.6 | -7.1  | <0.001 | 64  | 0.01   |
|      |                          | Week 2    | Week 8     | -22.7 | -14.2 | -5.8  | 0.001  | 78  | 0.01   |
|      |                          | Week 2    | Week 10    | -25.8 | -16.8 | -7.8  | <0.001 | 60  | 0.005  |
|      | Hind                     | Week 2    | Week 12    | -21.8 | -13.0 | -4.1  | 0.01   | 116 | 0.03   |
|      |                          | Week 2    | Week 16    | -19.8 | -10.9 | -2.1  | 0.02   | 164 | 0.1    |
|      |                          | Week 2    | Week 20    | -20.6 | -11.4 | -2.2  | 0.02   | 163 | 0.1    |
|      |                          | Week 2    | Week 24    | -20.4 | -11.6 | -2.7  | 0.01   | 139 | 0.1    |
|      |                          | Week 2    | Week 4     | -6.5  | 1.8   | 10.1  | 0.7    | 547 | 0.8    |
|      |                          | Week 2    | Week 6     | -12.9 | -4.5  | 4.0   | 0.3    | 397 | 0.5    |
|      |                          | Week 2    | Week 8     | -8.3  | 0.0   | 8.2   | 1.0    | 650 | 1.0    |
|      | Front                    | Week 2    | Week 10    | -13.0 | -4.5  | 4.1   | 0.3    | 403 | 0.5    |
|      |                          | Week 2    | Week 12    | -7.5  | 0.8   | 9.1   | 0.9    | 607 | 0.9    |
|      |                          | Week 2    | Week 16    | -12.5 | -4.1  | 4.4   | 0.4    | 421 | 0.6    |
|      |                          | Week 2    | Week 20    | -15.4 | -7.1  | 1.2   | 0.1    | 282 | 0.2    |
|      |                          | Week 2    | Week 24    | -13.4 | -4.9  | 3.5   | 0.3    | 379 | 0.5    |



|             |                          |             |                        |          |        |       |        |        |        |        |
|-------------|--------------------------|-------------|------------------------|----------|--------|-------|--------|--------|--------|--------|
| Trot        | MAD Medial - Lateral 50% | Left side   | Right side             | 0.0      | 2.8    | 5.7   | 0.1    | 235    | 0.2    |        |
|             |                          | Week 2      | Week 4                 | -18.2    | -9.9   | -1.6  | 0.02   | 177    | 0.1    |        |
|             |                          | Week 2      | Week 6                 | -21.3    | -13.1  | -4.9  | 0.003  | 91     | 0.02   |        |
|             |                          | Week 2      | Week 8                 | -18.1    | -9.9   | -1.7  | 0.02   | 170    | 0.1    |        |
|             |                          | Hind        | Week 2                 | Week 10  | -21.6  | -12.9 | -4.1   | 0.01   | 114    | 0.03   |
|             |                          | Week 2      | Week 12                | -17.5    | -9.0   | -0.4  | 0.05   | 221    | 0.1    |        |
|             |                          | Week 2      | Week 16                | -18.2    | -9.6   | -1.0  | 0.03   | 191    | 0.1    |        |
|             |                          | Week 2      | Week 20                | -18.8    | -9.9   | -1.0  | 0.04   | 197    | 0.1    |        |
|             |                          | Week 2      | Week 24                | -20.7    | -12.1  | -3.5  | 0.01   | 126    | 0.04   |        |
| Trot        | MAD Medial - Lateral 75% | Week 2      | Week 4                 | -6.9     | 2.1    | 11.2  | 0.7    | 532    | 0.8    |        |
|             |                          | Week 2      | Week 6                 | -12.3    | -3.1   | 6.1   | 0.5    | 482    | 0.7    |        |
|             |                          | Week 2      | Week 8                 | -10.6    | -1.6   | 7.3   | 0.7    | 559    | 0.9    |        |
|             |                          | Front       | Week 2                 | Week 10  | -12.9  | -3.6  | 5.7    | 0.5    | 464    | 0.7    |
|             |                          | Week 2      | Week 12                | -7.7     | 1.4    | 10.5  | 0.8    | 571    | 0.9    |        |
|             |                          | Week 2      | Week 16                | -9.8     | -0.6   | 8.6   | 0.9    | 630    | 0.9    |        |
|             |                          | Week 2      | Week 20                | -15.2    | -6.1   | 2.9   | 0.2    | 339    | 0.4    |        |
|             |                          | Week 2      | Week 24                | -15.3    | -6.1   | 3.1   | 0.2    | 340    | 0.4    |        |
|             |                          | Left side   | Right side             | 0.6      | 3.7    | 6.8   | 0.02   | 179    | 0.1    |        |
| Trot        | MAD Medial - Lateral 75% | Week 2      | Week 4                 | -32.4    | -23.4  | -14.3 | <0.001 | 23     | <0.001 |        |
|             |                          | Week 2      | Week 6                 | -31.4    | -22.5  | -13.5 | <0.001 | 26     | <0.001 |        |
|             |                          | Week 2      | Week 8                 | -33.9    | -24.9  | -16.0 | <0.001 | 17     | <0.001 |        |
|             |                          | Hind        | Week 2                 | Week 10  | -35.7  | -26.2 | -16.6  | <0.001 | 19     | <0.001 |
|             |                          | Week 2      | Week 12                | -27.8    | -18.4  | -9.1  | <0.001 | 53     | 0.003  |        |
|             |                          | Week 2      | Week 16                | -30.2    | -20.8  | -11.4 | <0.001 | 34     | <0.001 |        |
|             |                          | Week 2      | Week 20                | -36.4    | -26.6  | -16.9 | <0.001 | 20     | <0.001 |        |
|             |                          | Week 2      | Week 24                | -32.7    | -23.4  | -14.0 | <0.001 | 27     | <0.001 |        |
|             |                          | Walk        | Odds ratio T-H landing | Week 0,5 | Week 1 | 0.6   | 1.1    | 2.1    | 0.7    | 549    |
| Week 0,5    | Week 2                   |             |                        | 0.6      | 1.1    | 2     | 0.7    | 561    | 0.8    |        |
| Week 0,5    | Week 4                   |             |                        | 0.7      | 1.3    | 2.2   | 0.4    | 448    | 0.6    |        |
| Week 0,5    | Week 6                   |             |                        | 0.4      | 0.7    | 1.3   | 0.3    | 382    | 0.5    |        |
| Week 0,5    | Week 8                   |             |                        | 0.4      | 0.6    | 1.1   | 0.1    | 284    | 0.3    |        |
| Week 0,5    | Week 10                  |             |                        | 0.4      | 0.6    | 1.1   | 0.1    | 280    | 0.2    |        |
| Week 0,5    | Week 12                  |             |                        | 0.4      | 0.6    | 1.1   | 0.1    | 295    | 0.3    |        |
| Week 0,5    | Week 16                  |             |                        | 0.6      | 1.1    | 1.8   | 0.9    | 622    | 0.9    |        |
| Week 0,5    | Week 20                  |             |                        | 0.5      | 0.9    | 1.5   | 0.6    | 529    | 0.8    |        |
| Week 0,5    | Week 24                  |             |                        | 0.9      | 1.6    | 2.9   | 0.1    | 277    | 0.2    |        |
| Front limbs | Hind limbs               |             |                        | 0.7      | 0.9    | 1.1   | 0.3    | 392    | 0.5    |        |
| Trot        | Odds ratio T-H landing   | Left side   | Right side             | 0.7      | 0.9    | 1.1   | 0.4    | 435    | 0.6    |        |
|             |                          | Week 2      | Week 4                 | 0.4      | 0.8    | 1.4   | 0.4    | 440    | 0.6    |        |
|             |                          | Week 2      | Week 6                 | 0.4      | 0.7    | 1.2   | 0.2    | 349    | 0.4    |        |
|             |                          | Week 2      | Week 8                 | 0.3      | 0.5    | 1     | 0.04   | 208    | 0.1    |        |
|             |                          | Week 2      | Week 10                | 0.2      | 0.3    | 0.6   | <0.001 | 1      | <0.001 |        |
|             |                          | Week 2      | Week 12                | 0.3      | 0.5    | 0.9   | 0.01   | 138    | 0.1    |        |
|             |                          | Week 2      | Week 16                | 0.2      | 0.3    | 0.5   | <0.001 | 2      | <0.001 |        |
|             |                          | Week 2      | Week 20                | 0.3      | 0.5    | 0.9   | 0.02   | 166    | 0.1    |        |
|             |                          | Week 2      | Week 24                | 0.2      | 0.4    | 0.7   | 0.002  | 83     | 0.02   |        |
|             |                          | Front limbs | Hind limbs             | 0.9      | 1.1    | 1.4   | 0.5    | 475    | 0.7    |        |
|             |                          | Left side   | Right side             | 0.5      | 0.7    | 0.9   | 0.001  | 71     | 0.01   |        |
| Walk        | Odds ratio M-L landing   | Week 0,5    | Week 1                 | 0.4      | 0.7    | 1.2   | 0.2    | 322    | 0.3    |        |
|             |                          | Week 0,5    | Week 2                 | 0.2      | 0.4    | 0.8   | 0.004  | 102    | 0.03   |        |
|             |                          | Week 0,5    | Week 4                 | 0.2      | 0.3    | 0.5   | <0.001 | 3      | <0.001 |        |
|             |                          | Week 0,5    | Week 6                 | 0.1      | 0.2    | 0.3   | <0.001 | 4      | <0.001 |        |
|             |                          | Week 0,5    | Week 8                 | 0.1      | 0.2    | 0.3   | <0.001 | 5      | <0.001 |        |
|             |                          | Week 0,5    | Week 10                | 0.1      | 0.1    | 0.3   | <0.001 | 6      | <0.001 |        |
|             |                          | Week 0,5    | Week 12                | 0.1      | 0.2    | 0.3   | <0.001 | 7      | <0.001 |        |
|             |                          | Week 0,5    | Week 16                | 0.1      | 0.2    | 0.3   | <0.001 | 8      | <0.001 |        |
|             |                          | Week 0,5    | Week 20                | 0.1      | 0.2    | 0.3   | <0.001 | 9      | <0.001 |        |
|             |                          | Week 0,5    | Week 24                | 0.1      | 0.2    | 0.4   | <0.001 | 10     | <0.001 |        |
|             |                          | Front limbs | Hind limbs             | 1.7      | 2.2    | 2.9   | <0.001 | 11     | <0.001 |        |
| Left side   | Right side               | 0.4         | 0.5                    | 0.7      | <0.001 | 12    | <0.001 |        |        |        |
| Trot        | Odds ratio M-L landing   | Week 2      | Week 4                 | 0.3      | 0.5    | 0.9   | 0.03   | 182    | 0.1    |        |
|             |                          | Week 2      | Week 6                 | 0.3      | 0.5    | 0.9   | 0.03   | 193    | 0.1    |        |
|             |                          | Week 2      | Week 8                 | 0.2      | 0.4    | 0.8   | 0.01   | 111    | 0.03   |        |
|             |                          | Week 2      | Week 10                | 0.1      | 0.3    | 0.5   | <0.001 | 13     | <0.001 |        |
|             |                          | Week 2      | Week 12                | 0.2      | 0.4    | 0.7   | 0.002  | 84     | 0.02   |        |
|             |                          | Week 2      | Week 16                | 0.3      | 0.5    | 0.9   | 0.03   | 186    | 0.1    |        |
|             |                          | Week 2      | Week 20                | 0.3      | 0.6    | 1.1   | 0.1    | 250    | 0.2    |        |
|             |                          | Week 2      | Week 24                | 0.3      | 0.6    | 1     | 0.1    | 242    | 0.2    |        |
|             |                          | Front limbs | Hind limbs             | 0.7      | 1      | 1.3   | 0.9    | 621    | 0.9    |        |
| Left side   | Right side               | 0.3         | 0.4                    | 0.5      | <0.001 | 14    | <0.001 |        |        |        |
